# Supplementary material for: Overexpression of a Novel Arabidopsis Gene SUPA Leads to Various Morphological and Abiotic Stress Tolerance Alternations in Arabidopsis and Poplar
Source: Front Plant Sci. 2020 Nov 12;11:560985. doi: 10.3389/fpls.2020.560985 (PMC7688997; doi:10.3389/fpls.2020.560985)
Supplement: Supplementary Table 1 — List of all the DEGs. [file Table_1.XLSX]

## Sheet: Sheet1
Table S1. List of all the DEGs
Locus	SUPA-OX1/Col-0	p-value	SUPA-OX2/Col-0	p-value	Description	Other symbel
AT1G02575	0	0.0123174	0	0.0123174	transmembrane protein;(source:Araport11)
AT1G06020	0	0.00865645	0.195122	0.0478583	Encodes a member of the fructokinase gene family. Nomenclature according to Riggs 2017 has been adopted for the family by the community (personal communication, Boernke, Callis, Granot, Boernke, and Smeekens).	FRUCTOKINASE 5 (FRK5)
AT1G07060	0	0.0161301	0	0.0161301	hypothetical protein;(source:Araport11)	DSB FORMATION (DFO)
AT1G23500	0	0.0161301	0	0.0161301	GDSL-motif esterase/acyltransferase/lipase. Enzyme group with broad substrate specificity that may catalyze acyltransfer or hydrolase reactions with lipid and non-lipid substrates.
AT2G36760	0	5.56381e-64	0	5.56381e-64	UDP-glucosyl transferase 73C2;(source:Araport11)	UDP-GLUCOSYL TRANSFERASE 73C2 (UGT73C2)
At2g46455	0	0.0250472	0	0.0250472	OxaA/YidC-like membrane insertion protein;(source:Araport11)
AT2G46460	0	0.00728372	0	0.00728372	Polynucleotidyl transferase, ribonuclease H-like superfamily protein;(source:Araport11)
AT3G02670	0	0.00476494	0	0.00476494	Glycine-rich protein family;(source:Araport11)
AT3G29190	0	5.56381e-64	0	5.56381e-64	Terpenoid cyclases/Protein prenyltransferases superfamily protein;(source:Araport11)
AT3G44840	0	0.0161301	0	0.0161301	S-adenosyl-L-methionine-dependent methyltransferases superfamily protein;(source:Araport11)
AT3G52080	0	0.0161301	0	0.0161301	encodes a cation:proton exchanger expressed in pollen	CATION/HYDROGEN EXCHANGER 28 (chx28)
AT3G61510	0	0.00550256	0	0.00550256	Encodes a member of the 1-aminocyclopropane-1-carboxylate (ACC) synthase (S-adenosyl-L-methionine methylthioadenosine-lyase, EC 4.4.1.14) gene family. The gene is transcriptionally active but enzymatically inactive. The predicted amino-acid sequence of ACS1 is missing the highly conserved tripeptide, Thr-Asn-Pro (TNP), between Ile204 and Ser205. Introduction of TNP into ACS1 restores the ACS acti…	ACC SYNTHASE 1 (ACS1)
AT4G01820	0	0.0161301	0	0.0161301	member of MDR subfamily	ATP-BINDING CASSETTE B3 (ABCB3)
AT4G05631	0	0.0384416	0.0310559	0.0427477	hypothetical protein;(source:Araport11)
AT4G09200	0	0.000176717	0.00629496	0.000183714	SPla/RYanodine receptor (SPRY) domain-containing protein;(source:Araport11)
At4g09300	0	0.0136958	0	0.0136958	LisH and RanBPM domains containing protein;(source:Araport11)
AT4G09310	0	0.000176717	0.00629496	0.000183714	SPla/RYanodine receptor (SPRY) domain-containing protein;(source:Araport11)
AT4G12330	0	0.00237279	0.0302376	0.00272724	#N/A	#N/A
AT4G15953	0	0.000199223	0	0.000199223	Encodes a Maternally expressed gene (MEG) family protein
AT4G16162	0	0.000547965	0	0.000547965	Leucine-rich repeat (LRR) family protein;(source:Araport11)
AT4G20370	0	0.00749043	0.2	0.0474207	Encodes a floral inducer that is a homolog of FT. Plants overexpressing this gene flower earlier than Col. Loss-of-function mutations flower later in short days. TSF and FT play overlapping roles in the promotion of flowering, with FT playing the dominant role.TSF sequences show extensive variation in different accessions and may contribute to quantitative variation in flowering time in these acc…	TWIN SISTER OF FT (TSF)
AT5G15250	0	0.0161301	0	0.0161301	Encodes an FtsH protease that is localized to the chloroplast. AtFtsH6 is involved in the degradation of both Lhcb3 and Lhcb1 during senescence and high-light acclimation.	FTSH PROTEASE 6 (FTSH6)
AT5G22520	0	0.0248236	0	0.0248236	hypothetical protein;(source:Araport11)
AT5G27247	0	0.0172324	0	0.0172324	This gene encodes a small protein and has either evidence of transcription or purifying selection.
AT5G37440	0	0.000867279	0	0.000867279	Chaperone DnaJ-domain superfamily protein;(source:Araport11)
AT5G37750	0	0.00105168	0	0.00105168	Chaperone DnaJ-domain superfamily protein;(source:Araport11)
AT5G63225	0	0.0138549	0.18239	0.0330106	glycosyl hydrolase family protein 17
AT5G36930	0.00286123	7.18006e-07	0.00786838	9.78666e-07	Disease resistance protein (TIR-NBS-LRR class) family;(source:Araport11)
AT4G14905	0.00297324	5.81636e-05	0.00891972	6.22517e-05	Galactose oxidase/kelch repeat superfamily protein;(source:Araport11)
AT2G40010	0.00318182	0.000121666	0.00681818	0.000125384	Ribosomal protein L10 family protein;(source:Araport11)
AT5G28919	0.00359497	2.80494e-05	0.00874775	3.02534e-05	hypothetical protein;(source:Araport11)
AT5G28920	0.00436681	1.31437e-05	0.00280724	1.28655e-05	hypothetical protein;(source:Araport11)
AT3G11010	0.00829493	0.00598155	0.00921659	0.00602077	#N/A	#N/A
AT3G53650	0.010929	0.000543275	0.010929	0.000543275	Histone superfamily protein;(source:Araport11)
AT3G09160	0.011325	0.0127055	0.0339751	0.0138561	RNA-binding (RRM/RBD/RNP motifs) family protein;(source:Araport11)
AT4G01740	0.0114613	0.0027076	0	0.0025655	Cysteine/Histidine-rich C1 domain family protein;(source:Araport11)
AT4G19500	0.0131086	1.77635e-05	0.0175562	1.76624e-05	nucleoside-triphosphatase/transmembrane receptor/nucleotide binding/ATP binding protein;(source:Araport11)
AT5G35450	0.0135939	0.000142992	0.00679694	0.000131425	Disease resistance protein (CC-NBS-LRR class) family;(source:Araport11)
AT3G09162	0.0147203	0.000328593	0.100098	0.000467611	hypothetical protein;(source:Araport11)
AT4G15620	0.0153284	3.48108e-05	0.0166254	3.58702e-05	Uncharacterized protein family (UPF0497);(source:Araport11)	CASP-LIKE PROTEIN 1E2 (CASPL1E2)
AT4G13860	0.015544	0.000910353	0.0159758	0.0009138	RNA-binding (RRM/RBD/RNP motifs) family protein;(source:Araport11)
AT4G11900	0.0156676	0.0013433	0.0224796	0.00140002	S-locus lectin protein kinase family protein;(source:Araport11)
AT4G11070	0.0178891	0.010884	0.0357782	0.0115936	member of WRKY Transcription Factor; Group III	(WRKY41)
AT4G12990	0.0195853	0.000404087	0.0195853	0.000404087	transmembrane protein;(source:Araport11)
AT2G41440	0.0201932	3.83626e-05	0.0105356	2.85522e-05	agamous-like MADS-box protein;(source:Araport11)
AT1G13670	0.0257457	0.0294426	0.120094	0.04004	#N/A	#N/A
AT5G26890	0.0268741	0.0069504	0.0537482	0.00767539	hypothetical protein;(source:Araport11)
At5g37410	0.0271084	0.00389229	0.0150602	0.00358961	hypothetical protein (DUF577);(source:Araport11)
AT3G30720	0.0281301	1.14578e-06	0.0195935	1.43153e-06	QQS is an orphan gene that arose recently in the Arabidopsis thaliana lineage. It was first identified in a screen for genes with altered expression pattern in SS3 mutants which make an abundance of starch. Overexpression of QQS in Arabidopsis increases protein content and decreases total starch content. Thus it appears to function to modulate carbon/nitrogen allocation in Arabidopsis. Over expre…	QUA-QUINE STARCH (QQS)
AT5G65070	0.02849	0.000299275	0.279202	0.00295756	Encodes MADS-box containing FLC paralog. Five splice variants have been identified but not characterized with respect to expression patterns and/or differing function. Overexpression of the gene in the Landsberg ecotype leads to a delay in flowering, transcript levels of MAF4 are reduced after a 6 week vernalization.	MADS AFFECTING FLOWERING 4 (MAF4)
AT5G37300	0.0316456	0.0004141	0.221519	0.00176327	Encodes a bifunctional enzyme, wax ester synthase (WS) and diacylglycerol acyltransferase (DGAT). In vitro assay indicated a ratio of 10.9 between its WS and DGAT activities. Both mutant and in vivo expression/analysis in yeast studies indicated a role in wax biosynthesis.	(WSD1)
AT4G15340	0.0352941	0.0300499	0.0352941	0.0300499	Encodes a protein that catalyzes the production of the tricyclic triterpene arabidiol when expressed in yeast.	PENTACYCLIC TRITERPENE SYNTHASE 1 (PEN1)
AT5G45573	0.0502513	0.006033	0.175879	0.0109934	hypothetical protein;(source:Araport11)
AT2G32160	0.0509449	0.00341258	0.061627	0.00348689	S-adenosyl-L-methionine-dependent methyltransferases superfamily protein;(source:Araport11)
AT4G02540	0.0586194	0.000252635	0.0367056	0.000221401	Cysteine/Histidine-rich C1 domain family protein;(source:Araport11)
AT3G52970	0.0600962	0.00868138	0	0.00665291	member of CYP76G	"CYTOCHROME P450, FAMILY 76, SUBFAMILY G, POLYPEPTIDE 1" (CYP76G1)
AT5G61610	0.0606061	0.01351	0.236364	0.0259979	Oleosin family protein;(source:Araport11)
AT2G46450	0.0668719	0.000911202	0.0782295	0.00099361	Member of Cyclic nucleotide gated channel family.Positive regulator of resistance against avirulent fungal pathogen.Suppresses the phenotype conferred by cpr22 in a dosage-dependent manner.	CYCLIC NUCLEOTIDE-GATED CHANNEL 12 (CNGC12)
AT2G33080	0.0701754	0.00269253	0	0.00118994	receptor like protein 28;(source:Araport11)	RECEPTOR LIKE PROTEIN 28 (RLP28)
At4g19510	0.0716137	3.3513e-05	0.073882	3.44158e-05	Disease resistance protein (TIR-NBS-LRR class);(source:Araport11)
At5g37400	0.0730594	0.00282784	0	0.00187237	hypothetical protein (DUF577);(source:Araport11)
AT3G05140	0.0758808	0.0084511	0.0542005	0.00752571	ROP binding protein kinases 2;(source:Araport11)	ROP BINDING PROTEIN KINASES 2 (RBK2)
AT2G24850	0.0795838	0.0384553	0.145951	0.0496143	Encodes a tyrosine aminotransferase that is responsive to treatment with jasmonic acid.	TYROSINE AMINOTRANSFERASE 3 (TAT3)
AT3G09330	0.0833333	0.00156717	0.135417	0.00111791	Transmembrane amino acid transporter family protein;(source:Araport11)
AT3G22640	0.0900901	0.00255572	0.0900901	0.00255572	cupin family protein;(source:Araport11)	(PAP85)
AT5G28350	0.090792	8.95192e-06	0.0820992	1.06172e-06	Quinoprotein amine dehydrogenase, beta chain-like;(source:Araport11)
AT3G12820	0.0935961	0.00185401	0.0985222	0.000684986	Member of the R2R3 factor gene family.	MYB DOMAIN PROTEIN 10 (MYB10)
AT3G03500	0.0948276	0.0100299	0.275862	0.0359814	TatD related DNase;(source:Araport11)
AT2G14610	0.0961538	0.0121029	0.301579	0.0287953	PR1 gene expression is induced in response to a variety of pathogens. It is a useful molecular marker for the SAR response. Though the Genbank record for the cDNA associated to this gene is called 'PR-1-like', the sequence actually corresponds to PR1. Expression of this gene is salicylic-acid responsive.	PATHOGENESIS-RELATED GENE 1 (PR1)
AT4G06536	0.107461	0.00564362	0.132101	0.00611915	SPla/RYanodine receptor (SPRY) domain-containing protein;(source:Araport11)
AT4G12382	0.110599	0.00102132	0.396313	0.0140817	F-box family protein;(source:Araport11)
AT4G06534	0.114821	0.00143869	0.147627	0.00184578	transmembrane protein;(source:Araport11)
AT3G13435	0.118721	0.00252555	0.178082	0.00613038	transmembrane protein;(source:Araport11)
AT5G25020	0.119497	0.0359399	0.113208	0.034211	enhanced disease resistance-like protein (DUF1336);(source:Araport11)
AT5G50300	0.123077	0.0202229	0.184615	0.0312053	Encodes a homolog of the adenine-guanine-hypoxanthine transporter AzgA of Aspergillus nidulans. Function as a plant adenine-guanine transporter. Two closely related genes exist in Arabidopsis: AT3G10960 (Azg1) and AT5G50300 (Azg2).	AZA-GUANINE RESISTANT2 (AZG2)
AT4G11550	0.123188	0.00190145	0.304348	0.00306095	Cysteine/Histidine-rich C1 domain family protein;(source:Araport11)
AT3G09960	0.125683	0.00530224	0.0874317	0.00356042	Calcineurin-like metallo-phosphoesterase superfamily protein;(source:Araport11)
AT4G10160	0.131068	0.000256137	0.402913	0.00877212	RING/U-box superfamily protein;(source:Araport11)
AT2G39030	0.132179	0.0201557	0.160893	0.023635	Encodes a protein that acts as an ornithine N-delta-acetyltransferase, leading to the formation of N-delta-actetylornithine. This compound is likely used in plant defense and levels of it are increased in Arabidopsis plants in response to MeJA and ABA. The mRNA is cell-to-cell mobile.	N-ACETYLTRANSFERASE ACTIVITY 1 (NATA1)
AT1G48000	0.133028	0.00313871	0.394495	0.0257774	Encodes a putative transcription factor (MYB112).	MYB DOMAIN PROTEIN 112 (MYB112)
AT3G14210	0.136554	0.00161563	0.210191	0.00230023	A semidominant QTL which has an epistatic effect on the Epithiospecifier gene. Represses nitrile formation and favors isothiocyanate production during glucosinolate hydrolysis. The functional allele deters the insect herbivory T. ni.	EPITHIOSPECIFIER MODIFIER 1 (ESM1)
AT4G01595	0.141168	0.00013404	0.150776	2.07762e-05	Protein kinase superfamily protein;(source:Araport11)
AT4G12350	0.142857	0.00182626	0	0.000265505	Encodes a putative transcription factor (MYB42).	MYB DOMAIN PROTEIN 42 (MYB42)
AT1G05340	0.149202	0.013642	0.140874	0.0129862	cysteine-rich TM module stress tolerance protein;(source:Araport11)	CYSTEINE-RICH TRANSMEMBRANE MODULE 1 (ATHCYSTM1)
AT3G01630	0.155172	0.0201874	0.293103	0.018993	Major facilitator superfamily protein;(source:Araport11)
AT3G29670	0.156531	0.000554617	0.335522	0.00238213	Encodes a malonyltransferase that may play a role in phenolic xenobiotic detoxification. The mRNA is cell-to-cell mobile.	PHENOLIC GLUCOSIDE MALONYLTRANSFERASE 2 (PMAT2)
AT3G55970	0.157662	9.83727e-06	0.223206	0.00127556	One of 4 paralogs encoding a 2-oxoglutarate/Fe(II)-dependent oxygenases that hydroxylates JA to 12-OH-JA.	JASMONATE-REGULATED GENE 21 (JRG21)
AT5G22490	0.16	0.0206124	0.16	0.0206124	O-acyltransferase (WSD1-like) family protein;(source:Araport11)
AT1G02580	0.16	0.0206124	0.16	0.0206124	Encodes the imprinted gene MEA that belongs to Polycomb Repressive Complex 2 (PRC2) and has a SET domain for methyltransferase activity and is involved in the stable transcriptional silencing of target genes. It negatively regulates seed development in the absence of fertilization. Mutations in this locus result in embryo lethality. MEA is imprinted in the endosperm. The maternal allele is expres…	MEDEA (MEA)
AT4G13920	0.160763	0.0107167	0.156676	0.0103574	receptor like protein 50;(source:Araport11)	RECEPTOR LIKE PROTEIN 50 (RLP50)
AT1G12890	0.164557	0.00717064	0.329114	0.0152867	encodes a member of the ERF (ethylene response factor) subfamily B-1 of ERF/AP2 transcription factor family. The protein contains one AP2 domain. There are 15 members in this subfamily including ATERF-3, ATERF-4, ATERF-7, and leafy petiole.
AT5G24410	0.169014	0.0117409	0.112676	0.00663276	Encodes a cytosolic 6-phosphogluconolactonase (PGL) thought to be involved in the oxidative pentose-phosphate pathway (OPPP).	6-PHOSPHOGLUCONOLACTONASE 4 (PGL4)
AT1G65680	0.178771	0.039524	0.0614525	0.0226949	member of BETA-EXPANSINS. Naming convention from the Expansin Working Group (Kende et al, 2004. Plant Mol Bio)	EXPANSIN B2 (EXPB2)
AT2G32140	0.183594	0.0002635	0.230469	0.000246172	transmembrane receptor;(source:Araport11)
AT4G15393	0.184448	0.00273998	0.153707	0.00185094	a member of the cytochrome P450 gene family. molecular function unknown.	"CYTOCHROME P450, FAMILY 702, SUBFAMILY A, POLYPEPTIDE 5" (CYP702A5)
AT5G28450	0.185484	0.025051	0.193548	0.0281669	Chlorophyll A-B binding family protein;(source:Araport11)
AT2G05180	0.187135	0.00257745	0.450292	0.0085887	member of CYP705A	"CYTOCHROME P450, FAMILY 705, SUBFAMILY A, POLYPEPTIDE 6" (CYP705A6)
AT1G52790	0.189831	0.00292589	0.0915254	0.000725917	encodes a putative oxidoreductase, 2OG-Fe(II) oxygenase family protein, similar to GS-AOP loci (GI:16118889, GI:16118887, GI:16118891, GI:16118893); contains PF03171 2OG-Fe(II) oxygenase superfamily domain
At1g51870	0.194444	0.00175526	0.236111	0.00322756	protein kinase family protein;(source:Araport11)
AT4G30420	0.197368	0.0211084	0	0.00040843	nodulin MtN21-like transporter family protein	USUALLY MULTIPLE ACIDS MOVE IN AND OUT TRANSPORTERS 34 (UMAMIT34)
AT1G35730	0.2	0.0474207	0.2	0.0474207	Encodes a member of the Arabidopsis Pumilio (APUM) proteins containing PUF domain (eight repeats of approximately 36 amino acids each). PUF proteins regulate both mRNA stability and translation through sequence-specific binding to the 3' UTR of target mRNA transcripts.	PUMILIO 9 (PUM9)
AT4G13810	0.202993	0.000446971	0.186623	0.00042548	receptor like protein 47;(source:Araport11)	RECEPTOR LIKE PROTEIN 47 (RLP47)
AT2G35640	0.203991	0.0232969	0.354767	0.0485849	Homeodomain-like superfamily protein;(source:Araport11)
AT3G09270	0.207981	0.00164282	0.135654	0.00110282	Encodes glutathione transferase belonging to the tau class of GSTs. Naming convention according to Wagner et al. (2002).	GLUTATHIONE S-TRANSFERASE TAU 8 (GSTU8)
AT3G14340	0.208549	7.53104e-05	0.186499	8.29962e-05	hypothetical protein;(source:Araport11)
AT2G35740	0.210811	0.00670921	0.367568	0.0192799	nositol transporter 3;(source:Araport11)	NOSITOL TRANSPORTER 3 (INT3)
AT4G13630	0.212461	9.42309e-07	0.242368	2.26318e-06	zein-binding protein (Protein of unknown function, DUF593);(source:Araport11)
AT5G28510	0.214575	0.00987844	0.425101	0.0363708	beta glucosidase 24;(source:Araport11)	BETA GLUCOSIDASE 24 (BGLU24)
AT1G55790	0.216216	0.00192145	0	7.59985e-64	ferredoxin-fold anticodon-binding domain protein;(source:Araport11)
AT4G20480	0.217715	3.46646e-06	0.216038	1.26143e-05	Putative endonuclease or glycosyl hydrolase;(source:Araport11)
AT2G14580	0.21892	0.00790704	0.251114	0.0133141	pathogenesis related protein, encodes a basic PR1-like protein. Expresses in flowers, roots, and not in leaves and responses to ethylene and methyl jasmonate. Salicylic acid represses gene expression.	BASIC PATHOGENESIS-RELATED PROTEIN 1 (PRB1)
AT1G51470	0.221843	0.0272404	0.153584	0.02236	Encodes a myrosinase.	BETA GLUCOSIDASE 35 (BGLU35)
AT4G01590	0.222763	9.14487e-06	0.235742	7.70308e-06	DNA-directed RNA polymerase III subunit;(source:Araport11)
AT2G34210	0.229167	0.0249827	0.1875	0.0147206	Transcription elongation factor Spt5;(source:Araport11)	(SPT5-1)
AT4G15910	0.231595	7.77203e-05	0.234031	0.000309905	encodes a gene whose transcript level in root and leaves increases to progressive drought stress. The transcript level is also affected by changes of endogenous or exogenous abscisic acid level. It appears to be a member of plant-specific gene family that includes late embryo-abundant and zinc- IAA-induced proteins in other plants. The mRNA is cell-to-cell mobile.	DROUGHT-INDUCED 21 (DI21)
At3g53680	0.23225	4.61416e-06	0.320096	6.32753e-05	Acyl-CoA N-acyltransferase with RING/FYVE/PHD-type zinc finger domain-containing protein;(source:Araport11)
AT4G11211	0.23292	7.52501e-05	0.262752	0.000138557	hypothetical protein;(source:Araport11)
AT5G11290	0.235294	0.00289001	0.352941	0.0336823	transmembrane protein, putative (DUF247);(source:Araport11)
AT1G56630	0.238095	0.00411151	0.362637	0.0151711	alpha/beta-Hydrolases superfamily protein;(source:Araport11)
AT3G10200	0.242647	0.00823095	0.242647	0.0104956	S-adenosyl-L-methionine-dependent methyltransferases superfamily protein;(source:Araport11)
AT4G13100	0.249585	0.000816745	0.271519	0.000478616	RING/U-box superfamily protein;(source:Araport11)
AT4G12490	0.249611	0.0012103	0.156477	0.000863021	Encodes a member of the AZI family of lipid transfer proteins. Contains a PRR domain that appears to be required for localization to the chloroplast.	(AZI3)
AT2G26370	0.25813	0.0285268	0.302846	0.0345282	MD-2-related lipid recognition domain-containing protein;(source:Araport11)
AT3G55090	0.258824	0.000346829	0.141176	0.000234189	Belongs to a clade of five Arabidopsis thaliana ABCG half-transporters that are required for synthesis of an effective suberin barrier in roots and seed coats (ABCG2, ABCG6, and ABCG20) and for synthesis of an intact pollen wall (ABCG1 and ABCG16).	ATP-BINDING CASSETTE G16 (ABCG16)
AT4G15396	0.260274	0.0489167	0.226027	0.0375066	cytochrome P450, family 702, subfamily A, polypeptide 6;(source:Araport11)	"CYTOCHROME P450, FAMILY 702, SUBFAMILY A, POLYPEPTIDE 6" (CYP702A6)
AT5G37540	0.263238	0.000346895	0.231062	0.000282621	Eukaryotic aspartyl protease family protein;(source:Araport11)
AT2G42430	0.265306	0.0115096	0.156463	0.00596054	LOB-domain protein gene LBD16. This gene contains one auxin-responsive element (AuxRE).	LATERAL ORGAN BOUNDARIES-DOMAIN 16 (LBD16)
AT2G46130	0.267606	0.0115775	0	0.00307783	member of WRKY Transcription Factor; Group II-c	WRKY DNA-BINDING PROTEIN 43 (WRKY43)
At5g27060	0.269737	0.000577913	0.105263	0.000134577	receptor like protein 53;(source:Araport11)	RECEPTOR LIKE PROTEIN 53 (RLP53)
AT2G31865	0.270195	0.0105633	0.303621	0.0107928	poly(ADP-ribose) glycohydrolase 2;(source:Araport11)	POLY(ADP-RIBOSE) GLYCOHYDROLASE 2 (PARG2)
AT4G31354	0.271201	0.041308	0.090106	0.00469187	This gene encodes a small protein and has either evidence of transcription or purifying selection. The mRNA is cell-to-cell mobile.
AT1G61120	0.276006	0.00868846	0.152566	0.00505733	Encodes a geranyllinalool synthase that produces a precursor to TMTT, a volatile plant defense C16-homoterpene. GES transcript levels rise in response to alamethicin, a fungal peptide mixture that damages membranes. This transcriptional response is blocked in JA biosynthetic and JA signaling mutants, but GES transcript levels still rise in response to alamethicin in mutants with salicylic acid an…	TERPENE SYNTHASE 04 (TPS04)
AT4G15670	0.277778	0.0079662	0.266667	0.00615248	Encodes a member of the CC-type glutaredoxin (ROXY) family.	MONOTHIOL GLUTAREDOXIN-S7 (GRXS7)
AT1G33770	0.279188	0.00274272	0.253807	0.0003773	Protein kinase superfamily protein;(source:Araport11)
AT4G11521	0.282292	0.00189101	0.309375	0.00353086	Receptor-like protein kinase-related family protein;(source:Araport11)
AT2G45800	0.282337	0.0443886	0.239221	0.0378232	Encodes a member of the Arabidopsis LIM proteins: a family of actin bundlers with distinct expression patterns. WLIM1, WLIM2a, and WLIM2b are widely expressed, whereas PLIM2a, PLIM2b, and PLIM2c are predominantly expressed in pollen. Regulates actin cytoskeleton organization.	PLIM2A (PLIM2a)
AT2G35290	0.283906	0.00431151	0.359855	0.00646238	hypothetical protein;(source:Araport11)	SMALL AUXIN UPREGULATED RNA 79 (SAUR79)
AT4G08410	0.287529	0.040226	0.220554	0.0283705	Proline-rich extensin-like family protein;(source:Araport11)
AT1G35515	0.290944	0.000775433	0.186898	0.000419143	high response to osmotic stress 10;(source:Araport11)	HIGH RESPONSE TO OSMOTIC STRESS 10 (HOS10)
AT1G80160	0.293399	0.00711009	0.195599	0.0026477	Vicinal oxygen chelate (VOC) superfamily member.	GLYOXYLASE I 7 (GLYI7)
AT3G01420	0.294066	0.00277439	0.308336	0.0036163	Encodes an alpha-dioxygenase involved in protection against oxidative stress and cell death. Induced in response to Salicylic acid and oxidative stress. Independent of NPR1 in induction by salicylic acid. The mRNA is cell-to-cell mobile.	(DOX1)
AT2G39530	0.302174	0.00125778	0.254348	0.0043079	Uncharacterized protein family (UPF0497);(source:Araport11)	CASP-LIKE PROTEIN 4D1 (CASPL4D1)
AT1G01480	0.302326	0.012385	0.20155	0.00665463	a member of the 1-aminocyclopropane-1-carboxylate (ACC) synthase (S-adenosyl-L-methionine methylthioadenosine-lyase, EC 4.4.1.14) gene family, isolated from a flower-specific cDNA library.	1-AMINO-CYCLOPROPANE-1-CARBOXYLATE SYNTHASE 2 (ACS2)
AT2G38240	0.305842	0.034041	0.0893471	0.0116453	One of 4 paralogs encoding a 2-oxoglutarate/Fe(II)-dependent oxygenases that hydroxylates JA to 12-OH-JA.	JASMONATE-INDUCED OXYGENASE4 (JOX4)
AT1G19250	0.309179	0.0432352	0.256039	0.0273074	FMO1 is required for full expression of TIR-NB-LRR conditioned resistance to avirulent pathogens and for basal resistance to invasive virulent pathogens. Functions in an EDS1-regulated but SA-independent mechanism that promotes resistance and cell death at pathogen infection sites. FMO1 functions as a pipecolate N-hydroxylase and catalyzes the biochemical conversion of pipecolic acid to N-hydroxy…	FLAVIN-DEPENDENT MONOOXYGENASE 1 (FMO1)
AT5G43580	0.317879	0.00352866	0.349853	0.00950755	Predicted to encode a PR (pathogenesis-related) peptide that belongs to the PR-6 proteinase inhibitor family. Functions in resistance to necrotrophic fungi and insect herbivory. Six putative PR-6-type protein encoding genes are found in Arabidopsis: At2g38900, At2g38870, At5g43570, At5g43580, At3g50020 and At3g46860.	UNUSUAL SERINE PROTEASE INHIBITOR (UPI)
AT4G39800	0.31981	0.0119606	0.37691	0.0136841	** Referred to as MIPS2 in Mitsuhashi et al 2008. myo-inositol-1-phosphate synthase isoform 1.Expressed in leaf, root and silique. Immunolocalization experiments with an antibody recognizing MIPS1, MIPS2, and MIPS3 showed endosperm localization.	D-MYO-INOSITOL 3-PHOSPHATE SYNTHASE 1 (MIPS1)
AT5G23270	0.320261	0.0147206	0.457516	0.0255036	Membrane localized sucrose transporter.	SUGAR TRANSPORTER 11 (STP11)
AT4G15700	0.323068	0.00128884	0.237319	0.000326803	Encodes a member of the CC-type glutaredoxin (ROXY) family.	GLUTAREDOXIN 3 (GRXS3)
AT3G06470	0.324408	4.2459e-05	0.382227	5.85453e-05	GNS1/SUR4 membrane protein family;(source:Araport11)
AT4G21830	0.32596	0.00565611	0.322468	0.00785249	methionine sulfoxide reductase B7;(source:Araport11)	METHIONINE SULFOXIDE REDUCTASE B7 (MSRB7)
At4g13030	0.326638	0.000655244	0.232558	0.000115033	P-loop containing nucleoside triphosphate hydrolases superfamily protein;(source:Araport11)
At3g12170	0.327935	0.0267694	0.290148	0.0244085	Chaperone DnaJ-domain superfamily protein;(source:Araport11)
AT3G13760	0.328244	0.000299188	0.129771	0.000339383	Cysteine/Histidine-rich C1 domain family protein;(source:Araport11)
AT3G53370	0.329748	0.000405908	0.417046	0.00116308	S1FA-like DNA-binding protein;(source:Araport11)
AT2G43590	0.330663	0.00312109	0.303919	0.00280198	Chitinase family protein;(source:Araport11)
AT4G16745	0.332226	0.00880838	0.214286	0.002614	Exostosin family protein;(source:Araport11)
AT4G16950	0.334134	0.000154607	0.361712	0.00013528	Contains a putative nucleotide binding site and leucine-rich repeats. Similar to the plant resistance genes N and L6, and to the toll and interleukin-1 receptors. Confers resistance to Peronospora parasitica.Redundant function together with SIKIC1 and 3 in SNC1-mediated autoimmunity. Protein levels controlled by MUSE1 and MUSE2.	RECOGNITION OF PERONOSPORA PARASITICA 5 (RPP5)
AT4G07820	0.334586	0.0155365	0.381579	0.0197822	CAP (Cysteine-rich secretory proteins, Antigen 5, and Pathogenesis-related 1 protein) superfamily protein;(source:Araport11)
At5g22500	0.334882	0.00170982	0.420606	0.00263629	Encodes a member of the eight-member gene family encoding alcohol-forming fatty acyl-CoA reductases (FARs) identified in Arabidopsis thaliana. Three of the FARs, FAR1 (At5g22500), FAR4 (At3g44540) and FAR5 (At3g44550), are shown to generate the fatty alcohols found in root, seed coat, and wound-induced leaf tissue.	FATTY ACID REDUCTASE 1 (FAR1)
AT3G29250	0.343008	0.0199068	0.229449	0.0100535	NAD(P)-binding Rossmann-fold superfamily protein;(source:Araport11)	SHORT-CHAIN DEHYDROGENASE REDUCTASE 4 (SDR4)
AT4G22070	0.343234	0.0317076	0.283828	0.0251737	member of WRKY Transcription Factor; Group II-b	WRKY DNA-BINDING PROTEIN 31 (WRKY31)
AT5G45630	0.343262	0.0203248	0.368794	0.0267047	senescence regulator (Protein of unknown function, DUF584);(source:Araport11)
AT1G18970	0.343708	0.011729	0.364005	0.00986566	Encodes a germin-like protein with possible oxalate oxidase activity (based on GenBank record).	GERMIN-LIKE PROTEIN 4 (GLP4)
AT1G68050	0.344828	0.00954881	0.252874	0.0183248	Encodes FKF1, a flavin-binding kelch repeat F box protein, is clock-controlled, regulates transition to flowering. Forms a complex with GI on the CO promoter to regulate CO expression.	FLAVIN-BINDING, KELCH REPEAT, F BOX 1 (FKF1)
AT2G18980	0.34565	0.00310588	0.443405	0.0067859	Peroxidase superfamily protein;(source:Araport11)
AT4G20325	0.346971	0.00382541	0.493312	0.0195735	ribonuclease H2 subunit B;(source:Araport11)
AT1G02220	0.347158	0.00113899	0.367127	0.00417493	NAC domain containing protein 3;(source:Araport11)	NAC DOMAIN CONTAINING PROTEIN 3 (NAC003)
AT2G44380	0.347494	0.000843535	0.308831	0.00857406	Cysteine/Histidine-rich C1 domain family protein;(source:Araport11)
AT1G61800	0.349372	0.00361707	0.349372	0.00361707	glucose6-Phosphate/phosphate transporter 2. Expression is upregulated in the shoot of cax1/cax3 mutant. The mRNA is cell-to-cell mobile.	GLUCOSE-6-PHOSPHATE/PHOSPHATE TRANSLOCATOR 2 (GPT2)
AT5G43300	0.352201	0.0228207	0.484277	0.0376507	Encodes a member of the glycerophosphodiester phosphodiesterase (GDPD) family.	GLYCEROPHOSPHODIESTER PHOSPHODIESTERASE 3 (GDPD3)
AT2G36690	0.35296	0.000259627	0.32446	0.000189278	GIM2 is a 2-oxoglutarate-dependent dioxygenase involved in GA metabolism.	GERMINATION INSENSITIVE TO ABA MUTANT 2 (GIM2)
AT4G08870	0.354765	0.00115031	0.4982	0.00327199	Encodes one of the two arginase in the genome. Gene expression is enhanced by methyl jasmonate treatment. It is involved in the defense response to B.cinerea.	ARGININE AMIDOHYDROLASE 2 (ARGAH2)
AT4G13330	0.355972	0.0142436	0.18267	0.000495192	S-adenosyl-L-methionine-dependent methyltransferases superfamily protein;(source:Araport11)
AT4G02130	0.36183	0.00729424	0.408403	0.0114716	Encodes a protein with putative galacturonosyltransferase activity.	GALACTURONOSYLTRANSFERASE-LIKE 6 (GATL6)
AT2G39380	0.366577	0.00358576	0.289757	0.000273724	A member of EXO70 gene family, putative exocyst subunits, conserved in land plants. Arabidopsis thaliana contains 23 putative EXO70 genes, which can be classified into eight clusters on the phylogenetic tree.	EXOCYST SUBUNIT EXO70 FAMILY PROTEIN H2 (EXO70H2)
AT3G12830	0.368263	0.0286609	0.314371	0.0223621	SAUR-like auxin-responsive protein family;(source:Araport11)	SMALL AUXIN UPREGULATED 72 (SAUR72)
AT5G23830	0.37054	0.000298057	0.439774	0.00516249	MD-2-related lipid recognition domain-containing protein;(source:Araport11)
AT4G16807	0.372881	0.0300857	0.347458	0.0335953	ATP-dependent caseinolytic protease/crotonase family protein;(source:Araport11)
AT5G24100	0.376812	0.00195476	0.463768	0.0110704	Leucine-rich repeat protein kinase family protein;(source:Araport11)
AT1G55390	0.378378	0.0196305	0.432432	0.0402436	Cysteine/Histidine-rich C1 domain family protein;(source:Araport11)
At3g54040	0.378894	0.0157915	0.339403	0.0120824	PAR1 protein;(source:Araport11)
AT2G36770	0.380478	0.00767674	0.370518	0.00339381	UDP-Glycosyltransferase superfamily protein;(source:Araport11)
AT5G62150	0.380682	0.0151258	0.335227	0.00661401	peptidoglycan-binding LysM domain-containing protein;(source:Araport11)
AT2G46750	0.381158	0.0175906	0.237069	0.00803896	Encodes a homolog of rat L-gulono-1,4-lactone (L-GulL) oxidase that is involved in the biosynthesis of L-ascorbic acid.	L -GULONO-1,4-LACTONE ( L -GULL) OXIDASE 2 (GULLO2)
AT4G00700	0.382123	0.0421685	0.412291	0.0350026	C2 calcium/lipid-binding plant phosphoribosyltransferase family protein;(source:Araport11)	MULTIPLE C2 DOMAIN AND TRANSMEMBRANE REGION PROTEIN 9 (MCTP9)
AT1G67148	0.382992	0.0487436	0.317194	0.014941	hypothetical protein;(source:Araport11)
AT3G22570	0.384342	0.0476958	0.27758	0.0367819	Bifunctional inhibitor/lipid-transfer protein/seed storage 2S albumin superfamily protein;(source:Araport11)
At5g65690	0.386617	0.0208239	0.185874	0.00379615	Encodes a putative phosphoenolpyruvate carboxykinase (ATP-dependent). The mRNA is cell-to-cell mobile.	PHOSPHOENOLPYRUVATE CARBOXYKINASE 2 (PCK2)
AT5G22794	0.386819	0.00966955	0.197708	0.00017647	hypothetical protein;(source:Araport11)
AT3G50640	0.386897	0.0104837	0.401731	0.0212496	hypothetical protein;(source:Araport11)
AT3G45970	0.387331	0.0237564	0.272066	0.0087823	member of EXPANSIN-LIKE. Naming convention from the Expansin Working Group (Kende et al, 2004. Plant Mol Bio) The mRNA is cell-to-cell mobile.	EXPANSIN-LIKE A1 (EXLA1)
AT4G11320	0.388113	0.00244545	0.28104	0.00109693	Papain family cysteine protease;(source:Araport11)	CYSTEINE PROTEASE 2 (CP2)
AT3G23180	0.388249	0.0100306	0.402074	0.0016322	HR-like lesion-inducing protein-like protein;(source:Araport11)
AT1G26970	0.392	0.0232769	0.304	0.0131557	Protein kinase superfamily protein;(source:Araport11)
AT2G30340	0.393321	0.0341728	0.374768	0.00695887	LOB domain-containing protein 13;(source:Araport11)	LOB DOMAIN-CONTAINING PROTEIN 13 (LBD13)
AT4G22520	0.394415	0.0111566	0.407489	0.043601	Bifunctional inhibitor/lipid-transfer protein/seed storage 2S albumin superfamily protein;(source:Araport11)
AT3G09220	0.395526	0.0146484	0.362862	0.00542555	putative laccase, a member of laccase family of genes (17 members in Arabidopsis).	LACCASE 7 (LAC7)
AT1G77960	0.397638	0.00582953	0.419291	0.00224322	repressor ROX1-like protein;(source:Araport11)
AT4G12720	0.397736	0.00215966	0.424878	0.00303205	Encodes a protein with ADP-ribose hydrolase activity. Negatively regulates EDS1-conditioned plant defense and programmed cell death.	(NUDT7)
AT5G24910	0.398148	0.0115782	0.481481	0.0011738	Member of CYP714A. Encodes one of the two tandemly duplicated gene pair ELA1 (CYP714A1) and ELA2 (CYP714A2), homologs of the rice cytochrome P450 monooxygenase gene EUI1. Double mutation of ELA1 and ELA2 results in increased biomass and enlarged organs.	CYTOCHROME P450, FAMILY 714, SUBFAMILY A, POLYPEPTIDE 1 (CYP714A1)
AT2G47540	0.399034	0.0117577	0.361353	0.0239821	Pollen Ole e 1 allergen and extensin family protein;(source:Araport11)
AT3G29310	0.401405	0.00174034	0.420609	0.000776791	calmodulin-binding protein-like protein;(source:Araport11)
At4g19530	0.401555	0.00800081	0.375467	0.00684878	Encodes a TIR-NB-LRR resistance protein. Transient expression in tobacco induces cell death.
AT3G03470	0.402378	0.00120175	0.252816	1.71265e-05	member of CYP89A	"CYTOCHROME P450, FAMILY 87, SUBFAMILY A, POLYPEPTIDE 9" (CYP89A9)
AT4G30140	0.402498	0.00209002	0.483488	0.0242105	Member of the GDSL lipase/esterase family of proteins that functions as cutinase. Expressed in pollen and at the zone of lateral root emergence.	CUTICLE DESTRUCTING FACTOR 1 (CDEF1)
AT5G25230	0.402597	0.0256447	0.246753	0.0119502	Ribosomal protein S5/Elongation factor G/III/V family protein;(source:Araport11)
AT5G13320	0.402817	0.0153855	0.360563	0.0154508	Encodes an enzyme capable of conjugating amino acids to 4-substituted benzoates. 4-HBA (4-hydroxybenzoic acid) and pABA (4-aminobenzoate) may be targets of the enzyme in Arabidopsis, leading to the production of pABA-Glu, 4HBA-Glu, or other related compounds. This enzyme is involved in disease-resistance signaling. It is required for the accumulation of salicylic acid, activation of defense respo…	AVRPPHB SUSCEPTIBLE 3 (PBS3)
AT1G75040	0.403564	0.00700608	0.432935	0.00926474	Thaumatin-like protein involved in response to pathogens. mRNA level of the PR-5 gene (At1g75040)is significantly changed after cutting the inflorescence stem indicating the existence of a network of signal transducing pathways as other stress-regulated genes (At5g01410, At3g17800, At1g29930)do not response to the treatment. The mRNA is cell-to-cell mobile.	PATHOGENESIS-RELATED GENE 5 (PR5)
AT3G29760	0.406178	0.00209849	0.349352	0.00139427	Haloacid dehalogenase-like hydrolase (HAD) superfamily protein;(source:Araport11)
AT2G25980	0.407524	0.00643092	0.407524	0.000674803	Mannose-binding lectin superfamily protein;(source:Araport11)
AT1G33750	0.408377	0.0427558	0.497382	0.0450653	Terpenoid cyclases/Protein prenyltransferases superfamily protein;(source:Araport11)	TERPENE SYNTHASE 22 (TPS22)
AT2G45220	0.408412	0.0164218	0.33633	0.00732626	Plant invertase/pectin methylesterase inhibitor superfamily;(source:Araport11)	PECTIN METHYLESTERASE 17 (PME17)
AT4G16260	0.40928	0.00197213	0.351855	0.00103912	Encodes a putative beta-1,3-endoglucanase that interacts with the 30C02 cyst nematode effector. May play a role in host defense.
AT3G24982	0.413013	0.0276784	0.37058	0.0266625	receptor like protein 40;(source:Araport11)	RECEPTOR LIKE PROTEIN 40 (RLP40)
AT5G36925	0.415306	0.00154397	0.212187	0.000135462	hypothetical protein;(source:Araport11)	ARACIN1 (ARACIN1)
AT2G45430	0.416118	0.0273682	0.442434	0.0295823	Encodes a nuclear localized AT hook domain containing protein that can bind AT rich DNA in vitro. Overexpression of the gene results in delayed flowering. Is likely to act redundantly with AHL18, AHL27 and AHL29 in the regulation of flowering. It is also involved in both photo- and skotomorphogenesis.	AT-HOOK MOTIF NUCLEAR-LOCALIZED PROTEIN 22 (AHL22)
AT4G05200	0.418605	0.00689245	0.372093	0.00120772	Encodes a cysteine-rich receptor-like protein kinase.	CYSTEINE-RICH RLK (RECEPTOR-LIKE PROTEIN KINASE) 25 (CRK25)
AT4G14130	0.418981	0.0190396	0.21412	0.00662713	xyloglucan endotransglycosylase-related protein (XTR7)	XYLOGLUCAN ENDOTRANSGLUCOSYLASE/HYDROLASE 15 (XTH15)
AT3G12110	0.419851	0.000911994	0.404069	0.000186438	Encodes an actin that is expressed predominantly during reproductive development.	ACTIN-11 (ACT11)
AT1G35210	0.421144	0.011674	0.209705	0.00250578	hypothetical protein;(source:Araport11)
AT5G02350	0.423077	0.0260422	0.384615	0.00174853	Cysteine/Histidine-rich C1 domain family protein;(source:Araport11)
At1g61050	0.42616	0.0140831	0.392405	0.000529099	alpha 1,4-glycosyltransferase family protein;(source:Araport11)
AT5G25040	0.431465	8.5665e-05	0.365969	0.000813341	Major facilitator superfamily protein;(source:Araport11)
AT5G28400	0.432814	0.00545641	0.417966	0.00184277	embryo defective protein;(source:Araport11)
AT2G47530	0.435146	0.00307438	0.32636	0.00328279	Pollen Ole e 1 allergen and extensin family protein;(source:Araport11)
AT5G52790	0.436893	0.0374608	0.276699	0.0154421	CBS domain protein with a domain protein (DUF21);(source:Araport11)
AT2G46440	0.439108	0.00764852	0.328473	0.00778613	Member of Cyclic nucleotide gated channel family. Positive regulator of resistance against avirulent fungal pathogen. The mRNA is cell-to-cell mobile.	CYCLIC NUCLEOTIDE-GATED CHANNELS (CNGC11)
AT4G16880	0.440489	0.000118541	0.452446	0.00757283	Leucine-rich repeat (LRR) family protein;(source:Araport11)
AT5G28390	0.441079	0.00104816	0.375	0.000454463	RNA-binding (RRM/RBD/RNP motifs) family protein;(source:Araport11)
AT1G66280	0.441351	0.0035872	0.469005	0.00342965	Glycosyl hydrolase superfamily protein;(source:Araport11)	(BGLU22)
AT4G15400	0.441696	0.00808853	0.289753	0.0023105	Encodes BIA1, a member of the BAHD acyltransferase family. Plays a role in controlling brassinosteroids levels, particularly in the root and hypocotyl in darkness.	BRASSINOSTEROID INACTIVATOR1 (BIA1)
AT1G01620	0.444712	0.000834821	0.413869	0.00129099	a member of the plasma membrane intrinsic protein subfamily PIP1. localizes to the plasma membrane and exhibits water transport activity in Xenopus oocyte. expressed ubiquitously and protein level decreases slightly during leaf development.	PLASMA MEMBRANE INTRINSIC PROTEIN 1C (PIP1C)
AT5G24210	0.445378	0.00211461	0.253107	0.000303419	alpha/beta-Hydrolases superfamily protein;(source:Araport11)
AT1G52820	0.447933	0.047531	0.199523	0.0141372	2-oxoglutarate (2OG) and Fe(II)-dependent oxygenase superfamily protein;(source:Araport11)
AT4G18550	0.452381	0.0415381	0.487179	0.0427157	DSEL is cytosolic acylhydrolase that shows prefential lipase activity against the sn-1 position of several classes of lipids, including 1,3-diacylglycerols and 1-monoacylglycerols. Overexpression of DSEL leads to increased peroxisome and oil body levels in cotyledons and reduced beta-oxidation activity in seedlings.	DAD1-LIKE SEEDING ESTABLISHMENT-RELATED LIPASE (DSEL)
AT3G05570	0.456087	0.00994585	0.425217	0.00639405	dipeptide transport ATP-binding protein;(source:Araport11)
AT4G20410	0.45672	0.000763841	0.430798	0.000422415	Encodes a member of the gamma-soluble NSF attachment protein (gSNAP) gene family.	GAMMA-SOLUBLE NSF ATTACHMENT PROTEIN (GSNAP)
AT3G05727	0.458389	0.00906884	0.422031	0.0235565	Encodes a defensin-like (DEFL) family protein.
AT3G54770	0.459016	0.00513531	0.38152	0.00314673	Encodes a putative RNA binding protein that is localized in the nucleus and affects ABA-regulated seed germination of Arabidopsis.	ABA-REGULATED RNA-BINDING PROTEIN 1 (ARP1)
AT5G64100	0.459296	0.0157354	0.440906	0.0119116	Peroxidase superfamily protein;(source:Araport11)
AT2G38390	0.461329	0.00154097	0.408315	0.000731526	Peroxidase superfamily protein;(source:Araport11)
AT4G07825	0.461875	0.000118911	0.461596	0.000154797	transmembrane protein;(source:Araport11)
AT2G38790	0.463305	0.017562	0.293973	0.00225627	hypothetical protein;(source:Araport11)
AT5G47000	0.46519	0.0121291	0.387131	0.00255664	Peroxidase superfamily protein;(source:Araport11)
AT5G53990	0.466411	0.0302417	0.364683	0.0117048	UDP-Glycosyltransferase superfamily protein;(source:Araport11)
AT5G56810	0.466518	0.00654113	0.363839	0.00345369	F-box/RNI-like/FBD-like domains-containing protein;(source:Araport11)
AT3G56450	0.470822	0.00842825	0.415119	0.00449729	member of alpha-SNAP Gene Family	ALPHA-SOLUBLE NSF ATTACHMENT PROTEIN 1 (ALPHA-SNAP1)
AT3G11000	0.472727	0.0144665	0.218182	0.0165233	DCD (Development and Cell Death) domain protein;(source:Araport11)
AT1G73260	0.473648	0.0141412	0.322244	0.0035218	Encodes a trypsin inhibitor involved in modulating programmed cell death in plant-pathogen interactions.	KUNITZ TRYPSIN INHIBITOR 1 (KTI1)
At4g16140	0.474232	0.0056474	0.484634	0.00347217	proline-rich family protein;(source:Araport11)
AT2G02610	0.47541	0.0106138	0.459016	0.0126834	Cysteine/Histidine-rich C1 domain family protein;(source:Araport11)
AT5G66630	0.475904	0.0443556	0.297189	0.00712875	DA1-related protein 5;(source:Araport11)	DA1-RELATED PROTEIN 5 (DAR5)
AT5G66690	0.479536	0.0285756	0.474038	0.0303227	UGT72E2 is an UDPG:coniferyl alcohol glucosyltransferase which glucosylates sinapyl- and coniferyl aldehydes as well as sinapyl- and coniferyl alcohol. The enzyme is thought to be involved in lignin metabolism. A knockdown mutant line (72E2KD) was obtained using RNAi silencing. A twofold reduction in coniferyl alcohol 4-O-glucoside and sinapyl alcohol 4-O-glucoside was detected in this line compa…	(UGT72E2)
AT2G16385	0.481481	0.000866978	0.481481	0.000866978	CAF1 is a peptide hormone expressed in the root stele that specifically binds the endodermis-expressed leucine-rich repeat receptor kinase GASSHO1 (GSO1)/SCHENGEN3 and its homolog, GSO2. Together with CAF2 it is required for formation of the casparian band.	CASPARIAN STRIP INTEGRITY FACTOR 1 (CIF1)
AT3G04570	0.486842	0.00234582	0.361111	0.000553523	AT-hook motif nuclear-localized protein 19;(source:Araport11)	AT-HOOK MOTIF NUCLEAR-LOCALIZED PROTEIN 19 (AHL19)
AT5G66870	0.488327	0.00102272	0.383268	0.00631926	Encodes LOB domain protein whose overexpression results in KNOX gene repression. Overexpression also results in plants with hyponastic leaves, downward pointing flowers and reduced apical dominance. May be involved in the transcriptional regulation of the homeobox gene BP (brevipedicellus) during lateral organ differentiation. Acts together with AS2 in proximal-distal symmetry determination.	ASYMMETRIC LEAVES 2-LIKE 1 (ASL1)
AT2G16900	0.488804	0.000863049	0.423193	0.0031659	phospholipase-like protein (PEARLI 4) family protein;(source:Araport11)
AT4G13575	0.492598	0.00105924	0.332209	0.000499925	hypothetical protein;(source:Araport11)
AT3G21180	0.493151	0.036047	0.479452	0.0252726	one of the type IIB calcium pump isoforms. encodes an autoinhibited Ca(2+)-ATPase that contains an N-terminal calmodulin binding autoinhibitory domain.	AUTOINHIBITED CA(2+)-ATPASE 9 (ACA9)
AT5G13900	0.494876	0.0111079	0.340166	0.0108712	Bifunctional inhibitor/lipid-transfer protein/seed storage 2S albumin superfamily protein;(source:Araport11)
AT5G39110	0.49501	0.048808	0.341317	0.00981383	RmlC-like cupins superfamily protein;(source:Araport11)
AT2G24610	0.495146	0.0101279	0.242718	0.00157	member of Cyclic nucleotide gated channel family	CYCLIC NUCLEOTIDE-GATED CHANNEL 14 (CNGC14)
AT1G25141	0.49534	0.00932953	0.476698	0.0207192	F-box associated ubiquitination effector family protein;(source:Araport11)
AT2G38940	0.495772	0.0145363	0.372322	0.0109533	Encodes Pht1;4, a member of the Pht1 family of phosphate transporters which include: Pht1;1/At5g43350, Pht1;2/At5g43370, Pht1;3/At5g43360, Pht1;4/At2g38940, Pht1;5/At2g32830, Pht1;6/At5g43340, Pht1;7/At3g54700, Pht1;8/At1g20860, Pht1;9/At1g76430 (Plant Journal 2002, 31:341). Expression is upregulated in the shoot of cax1/cax3 mutant and is responsive to phosphate (Pi) and not phosphite (Phi) in r…	PHOSPHATE TRANSPORTER 1;4 (PHT1;4)
AT5G39580	0.496892	0.0122344	0.374406	0.0038807	Peroxidase superfamily protein;(source:Araport11)
AT1G35140	0.499567	0.000455652	0.22938	6.67833e-06	EXL1 is involved in the C-starvation response. Phenotypic changes of an exl1 loss of function mutant became evident only under corresponding experimental conditions. For example, the mutant showed diminished biomass production in a short-day/low light growth regime, impaired survival during extended night, and impaired survival of anoxia stress.	PHOSPHATE-INDUCED 1 (PHI-1)
AT1G66600	2	0.0499782	4.0122	0.0349007	A member of WRKY Transcription Factor; Group III. Involved in the regulation of plant responses to ABA and drought stress.	ABA OVERLY SENSITIVE MUTANT 3 (ABO3)
AT1G13610	2.01923	0.0208048	2.40385	0.0165293	alpha/beta-Hydrolases superfamily protein;(source:Araport11)
AT3G03820	2.02606	0.0160079	2.22201	0.000777057	SAUR-like auxin-responsive protein family;(source:Araport11)	SMALL AUXIN UP RNA 29 (SAUR29)
AT3G05400	2.03351	0.0153572	2.30989	0.0105439	Major facilitator superfamily protein;(source:Araport11)
AT5G22310	2.04151	0.0112892	2.14403	0.00806788	trichohyalin-like protein;(source:Araport11)
At2g38780	2.05808	0.00022328	2.0825	0.000129567	cytochrome C oxidase subunit;(source:Araport11)
AT1G62440	2.07724	0.00114443	4.06472	0.000259025	encodes a paralog of LRX1 (LEUCINE-RICH REPEAT/EXTENSIN 1) which acts synergistically with LRX1 in root hair cell morphogenesis.	LEUCINE-RICH REPEAT/EXTENSIN 2 (LRX2)
AT2G39130	2.08207	0.00422852	2.23625	0.000620343	Transmembrane amino acid transporter family protein;(source:Araport11)
AT4G12400	2.12229	0.00508338	2.46861	0.015608	Encodes one of the 36 carboxylate clamp (CC)-tetratricopeptide repeat (TPR) proteins (Prasad 2010, Pubmed ID: 20856808) with potential to interact with Hsp90/Hsp70 as co-chaperones.	HOP3 (Hop3)
AT1G78970	2.12395	0.0009557	2.50653	0.000205735	Lupeol synthase. Converts oxidosqualene to multiple triterpene alcohols and a triterpene diols. This conversion proceeds through the formation of a 17β-dammarenyl cation.	LUPEOL SYNTHASE 1 (LUP1)
AT3G61520	2.14692	0.00995139	2.43365	0.00165953	Pentatricopeptide repeat (PPR) superfamily protein;(source:Araport11)
AT4G23680	2.15503	0.0495964	2.41699	0.000318603	Polyketide cyclase/dehydrase and lipid transport superfamily protein;(source:Araport11)
AT4G12980	2.15961	0.000898894	2.11379	0.00110532	Auxin-responsive family protein;(source:Araport11)
AT5G23570	2.16387	0.000973852	2.30516	0.000247413	Required for posttranscriptional gene silencing and natural virus resistance.SGS3 is a member of an 'unknown' protein family. Members of this family have predicted coiled coiled domains suggesting oligomerization and a potential zinc finger domain. Involved in the production of trans-acting siRNAs, through direct or indirect stabilization of cleavage fragments of the primary ta-siRNA transcript. …	SUPPRESSOR OF GENE SILENCING 3 (SGS3)
AT3G54510	2.17556	0.0210465	2.06222	0.0249475	Early-responsive to dehydration stress protein (ERD4);(source:Araport11)
AT1G04880	2.17801	0.0455636	2.87958	0.0248815	Encodes a ARID-HMG DNA-binding protein that functions in pollen tube growth through the regulation of gene expression by interacting with the transcription factors AGL66 and AGL104.	ARID-HMG DNA-BINDING PROTEIN 15 (HMGBD15)
AT1G53700	2.19132	0.00109603	3.31262	0.00316194	The WAG1 and its homolog, WAG2 each encodes a protein-serine/threonine kinase that are nearly 70% identical to PsPK3 protein. All three together with CsPK3 belong to PsPK3-type kinases. At the N-terminus, all four possess a serine/threonine-rich domain. They are closely related to Arabidopsis kinases PINOID. wag1/wag2 double mutants exhibit a pronounced wavy root phenotype when grown vertically o…	WAG 1 (WAG1)
AT4G12300	2.19971	6.26495e-05	2.38897	0.000780381	#N/A	#N/A
AT4G14840	2.20455	0.00271377	2.16288	0.00817005	spindle assembly abnormal protein;(source:Araport11)
AT4G02482	2.22364	0.0285009	2.65495	0.00694874	translocase of chloroplast-like protein;(source:Araport11)
AT5G24110	2.27865	0.00195875	2.15078	0.0473546	member of WRKY Transcription Factor; Group III	WRKY DNA-BINDING PROTEIN 30 (WRKY30)
AT5G24060	2.33354	5.9086e-05	2.40091	0.0005796	Pentatricopeptide repeat (PPR) superfamily protein;(source:Araport11)
AT5G37130	2.37181	0.00037649	2.55368	2.83224e-05	Protein prenylyltransferase superfamily protein;(source:Araport11)
AT5G37000	2.37215	0.00493201	2.86835	0.00126154	glycosyltransferase family exostosin protein;(source:Araport11)
AT1G50830	2.38938	0.00178527	3.44248	0.00439308	Aminotransferase-like, plant mobile domain family protein;(source:Araport11)
AT2G40960	2.45266	9.01101e-05	2.74058	0.00175062	Single-stranded nucleic acid binding R3H protein;(source:Araport11)
AT2G15042	2.46635	0.00863111	2.79327	0.010438	Leucine-rich repeat (LRR) family protein;(source:Araport11)
AT4G09080	2.48837	0.0125947	3	0.0264925	#N/A	#N/A
AT5G28910	2.49189	0.0135708	2.94595	0.00372186	alpha-(1,6)-fucosyltransferase;(source:Araport11)
AT4G11290	2.51538	3.06688e-05	2.56496	0.00170719	Peroxidase superfamily protein;(source:Araport11)
AT5G57240	2.53662	0.0118203	2.33166	0.00122888	OSBP(oxysterol binding protein)-related protein 4C;(source:Araport11)	OSBP(OXYSTEROL BINDING PROTEIN)-RELATED PROTEIN 4C (ORP4C)
AT5G65090	2.57297	0.00100971	2.77297	0.01045	#N/A	#N/A
AT3G12040	2.61464	0.00425209	2.06768	0.0418244	Encodes a 3-methyladenine-DNA glycosylase. Arabdiopsis cDNA complements the methyl methanesulfonate-sensitive phenotype of an Escherichia coli double mutant deficient in 3-methyladenine glycosylases (DNA-3-methyladenine glycosidases I and II, EC 3.2.2.20 and 3.2.2.21, respectively, encoded by tag and alkA).
AT3G55290	2.62647	0.00130127	2.81457	2.9405e-06	NAD(P)-binding Rossmann-fold superfamily protein;(source:Araport11)	SHORT-CHAIN DEHYDROGENASE/REDUCTASE ISOFORM D (SDRD)
At3g09550	2.64228	0.0147059	2.52033	0.00287921	Ankyrin repeat family protein;(source:Araport11)
AT2G42980	2.65414	0.0291292	2.29323	0.0310689	Eukaryotic aspartyl protease family protein;(source:Araport11)
AT5G23930	2.65493	0.00453383	3.44366	0.000961289	Mitochondrial transcription termination factor family protein;(source:Araport11)
AT2G42610	2.68324	0.00102408	2.54572	0.00468019	LIGHT-DEPENDENT SHORT HYPOCOTYLS-like protein (DUF640);(source:Araport11)	LIGHT SENSITIVE HYPOCOTYLS 10 (LSH10)
At4g15563	2.68539	0.00558291	2.65543	0.00108878	F-box-like protein;(source:Araport11)
At3g06630	2.7268	0.0491211	3.21134	0.00411316	protein kinase family protein;(source:Araport11)
AT4G18220	2.77452	0.00433763	2.02331	0.00111799	Drug/metabolite transporter superfamily protein;(source:Araport11)
At1g11990	2.90196	0.0347209	2.13725	0.0125351	O-fucosyltransferase family protein;(source:Araport11)
AT5G36260	2.90217	0.00270866	2.78261	0.00401573	Eukaryotic aspartyl protease family protein;(source:Araport11)	(A36)
AT3G14370	2.95118	0.00967221	4.86532	0.000320805	The WAG2 and its homolog, WAG1 each encodes protein-serine/threonine kinase that are nearly 70% identical to PsPK3 protein. All three together with CsPK3 belong to PsPK3-type kinases. At the N-terminus, all four possess a serine/threonine-rich domain. They are closely related to Arabidopsis kinases PINOID. wag1/wag2 double mutants exhibit a pronounced wavy root phenotype when grown vertically on …	(WAG2)
AT5G27220	2.96939	0.00164197	3.56122	0.00113504	Frigida-like protein;(source:Araport11)
AT5G36870	3.01923	0.0388352	3.01923	0.0388352	#N/A	#N/A
AT2G22810	3.02549	0.000405231	4.12549	0.0297732	key regulatory enzyme in the biosynthesis of the plant hormone ethylene. ACS4 is specifically induced by indoleacetic acid (IAA).	1-AMINOCYCLOPROPANE-1-CARBOXYLATE SYNTHASE 4 (ACS4)
AT5G57450	3.03571	0.009521	2.42857	0.0205837	Involved in homologous recombination and recombinational repair, mutants are sterile, hypersensitive to DNA crosslinking agents, show aberrant meiosis with extensive chromosome fragmentation	HOMOLOG OF X-RAY REPAIR CROSS COMPLEMENTING 3 (XRCC3)
AT1G49000	3.05785	0.047416	2.49115	0.0289886	transmembrane protein;(source:Araport11)
AT2G35810	3.23583	0.000550404	2.86998	5.53938e-06	ureidoglycolate hydrolase;(source:Araport11)
AT4G12310	3.28659	0.00012507	3.49695	0.00111788	#N/A	#N/A
AT5G02570	3.30189	0.012584	2.59119	0.0366902	Histone superfamily protein;(source:Araport11)
AT5G50335	3.33652	0.00518706	3.82458	0.00128057	hypothetical protein;(source:Araport11)
AT4G14819	3.33731	0.00130509	4.7056	0.00203215	hypothetical protein (DUF1677);(source:Araport11)
AT2G41690	3.38571	0.0112007	2.7	0.0188596	member of Heat Stress Transcription Factor (Hsf) family	HEAT SHOCK TRANSCRIPTION FACTOR B3 (HSFB3)
AT4G15440	3.4083	0.00357982	7.75328	2.08091e-06	Encodes a hydroperoxide lyase. Also a member of the CYP74B cytochrome p450 family. In the ecotype Columbia (Col) the gene contains a 10-nucleotide deletion in its first exon that causes it to code for a truncated protein that results in a non-functional hydroperoxide lyase.	HYDROPEROXIDE LYASE 1 (HPL1)
AT5G35480	3.41423	0.0038561	2.55533	0.0125394	hypothetical protein;(source:Araport11)
AT5G23020	3.42546	0.00515955	4.52058	7.93541e-05	methylthioalkymalate synthase-like. Also known as 2-isopropylmalate synthase (IMS2). encodes a methylthioalkylmalate synthase involved in the biosynthesis of aliphatic glucosinolates which accepts all the omega-methylthio-2-oxoalkanoic acids needed to form the known C3 to C8 glucosinolates in Arabidopsis. The mRNA is cell-to-cell mobile.	2-ISOPROPYLMALATE SYNTHASE 2 (IMS2)
AT2G29500	3.50187	0.0213447	3.71536	0.0443774	HSP20-like chaperones superfamily protein;(source:Araport11)
AT5G47330	3.65451	0.00268512	3.27639	0.00700118	alpha/beta-Hydrolases superfamily protein;(source:Araport11)
AT4G17470	3.67535	0.00299444	3.8075	0.00105736	alpha/beta-Hydrolases superfamily protein;(source:Araport11)
AT4G11360	3.68454	0.00141543	3.09034	0.000998429	Encodes a putative RING-H2 finger protein RHA1b. The mRNA is cell-to-cell mobile.	RING-H2 FINGER A1B (RHA1B)
AT1G23730	3.74776	0.00787666	3.21122	0.0168552	beta carbonic anhydrase 3;(source:Araport11)	BETA CARBONIC ANHYDRASE 3 (BCA3)
AT3G20470	3.74821	0.00112716	3.09716	0.000905138	encodes a glycine-rich protein that is expressed more abundantly in immature seed pods than in stems and leaves. Expression is not detected in roots or flowers.	GLYCINE-RICH PROTEIN 5 (GRP5)
AT3G62210	3.75	0.0177043	3.25	0.0108226	#N/A	#N/A
AT1G80730	3.78378	0.0141826	3.02703	0.0389043	Encodes a zinc finger protein and is expressed at high levels in the shoot apex, including the apical meristem, developing leaves and the developing vascular system. expression induced three days post germination. T-DNA insertion mutant has a dominant phenotype in leaf initiation.	ZINC-FINGER PROTEIN 1 (ZFP1)
AT1G49640	3.84561	0.00394034	3.26667	0.00132136	alpha/beta-Hydrolases superfamily protein;(source:Araport11)
AT1G01660	3.94681	0.0245717	2.57447	0.0287788	RING/U-box superfamily protein;(source:Araport11)
AT5G61890	4.08108	0.0334497	3.32432	0.0349087	encodes a member of the ERF (ethylene response factor) subfamily B-4 of ERF/AP2 transcription factor family. The protein contains one AP2 domain. There are 7 members in this subfamily.	(ERF114)
AT5G24155	4.08175	0.00400842	4.9106	0.00516984	FAD/NAD(P)-binding oxidoreductase family protein;(source:Araport11)
AT1G01670	4.10938	0.00185758	4.23437	0.00012221	RING/U-box superfamily protein;(source:Araport11)
AT3G12460	4.14583	0.0107237	2.0625	0.0226925	Polynucleotidyl transferase, ribonuclease H-like superfamily protein;(source:Araport11)
AT2G13660	4.31705	0.0013858	4.15424	0.00126822	hypothetical protein;(source:Araport11)
AT3G01900	4.32	0.0209552	3.62	0.0331742	#N/A	#N/A
AT4G13560	4.33095	0.000775896	3.50238	0.00302515	#N/A	#N/A
AT2G40050	4.42	0.014803	6.84	0.00258353	Cysteine/Histidine-rich C1 domain family protein;(source:Araport11)
AT3G03230	4.5	0.00219213	4.9375	0.00575919	alpha/beta-Hydrolases superfamily protein;(source:Araport11)
AT3G14380	4.72	0.0392206	6.64	0.00128003	Uncharacterized protein family (UPF0497);(source:Araport11)	CASP-LIKE PROTEIN 2A2 (CASPL2A2)
AT1G61255	4.73783	0.0034534	5.07378	0.004095	hypothetical protein;(source:Araport11)
AT2G36590	4.77143	0.00735748	5.85195	0.00370797	Encodes a proline transporter with affinity for gly betaine, proline, and GABA. Protein is expressed in leaves, flowers and siliques but to a much lesser extent in roots.	PROLINE TRANSPORTER 3 (ProT3)
AT4G14140	4.82143	0.00665647	4.07143	0.00109282	This gene is predicted to encode a DNA methyltransferase. A plant line expressing an RNAi construct directed against DMT2 has reduced agrobacterium-mediated tumor formation.	DNA METHYLTRANSFERASE 2 (DMT2)
AT1G14930	5.04167	0.0236794	3.29167	0.0165844	Polyketide cyclase/dehydrase and lipid transport superfamily protein;(source:Araport11)
AT5G03090	5.22188	0.00207735	2.80938	0.0198255	Mto 1 responding down protein;(source:Araport11)
AT3G56890	5.32576	0.00510416	3.37879	0.00553205	F-box associated ubiquitination effector family protein;(source:Araport11)
AT5G22355	5.3625	0.00056021	5.575	0.000192336	Cysteine/Histidine-rich C1 domain family protein;(source:Araport11)
AT4G08780	5.48571	0.000199731	7.88571	0.0086489	Peroxidase superfamily protein;(source:Araport11)
AT2G39330	5.67331	0.00131362	5.11633	0.00796176	jacalin-related lectin 23;(source:Araport11)	JACALIN-RELATED LECTIN 23 (JAL23)
AT4G16240	5.81614	0.00304958	6.41928	0.00492924	hypothetical protein;(source:Araport11)
AT4G19430	6.05102	0.0209635	2.77551	0.00349332	hypothetical protein;(source:Araport11)
AT2G36540	6.107	0.00393423	9.30864	0.000276427	Haloacid dehalogenase-like hydrolase (HAD) superfamily protein;(source:Araport11)
AT2G47670	6.125	0.00614308	5.68452	0.00776186	Plant invertase/pectin methylesterase inhibitor superfamily protein;(source:Araport11)	PECTIN METHYLESTERASE INHIBITOR 6 (PMEI6)
AT2G34655	6.63462	0.0107393	15.3942	0.0284665	hypothetical protein;(source:Araport11)
AT5G44440	6.70423	0.0022732	8.33803	0.00757279	FAD-binding Berberine family protein;(source:Araport11)
AT1G50290	6.7283	0.000221566	6.60253	9.71435e-06	hypothetical protein;(source:Araport11)
At4g16940	6.768	0.00844454	6.624	0.0205333	Redundant function together with SIKIC2 and 3 in SNC1-mediated autoimmunity. Protein levels controlled by MUSE1 and MUSE2.	SIDEKICK SNC1 1 (SIKIC1)
AT5G56300	8.11111	0.0170372	8.87037	0.00264	A member of the Arabidopsis SABATH methyltransferase gene family. Encodes GAMT2, a methyltransferase that uses S-adenosine-L-methionine (SAM) as a methyl donor to methylate the carboxyl group of GAs, resulting in the methyl esters of GAs (MeGAs). Expressed most highly in the siliques during seed development.	GIBBERELLIC ACID METHYLTRANSFERASE 2 (GAMT2)
AT4G20210	8.73333	0.0432772	6.8	0.0282101	Terpenoid cyclases/Protein prenyltransferases superfamily protein;(source:Araport11)	TERPENE SYNTHASE 8 (TPS08)
AT4G18650	9	0.00804989	7	0.0499481	A maternally expressed imprinted gene in the endosperm. It's expression is positively regulated by ROS1.	DOG1-LIKE 4 (DOGL4)
AT3G46230	9.85581	0.000642733	14.7209	0.00867899	member of the class I small heat-shock protein (sHSP) family, which accounts for the majority of sHSPs in maturing seeds	HEAT SHOCK PROTEIN 17.4 (HSP17.4)
AT2G41470	11.0952	0.000946273	10.1429	0.0099795	agamous-like MADS-box protein;(source:Araport11)
AT1G05550	12.5733	0.00240059	9.8	0.000253157	hypothetical protein (DUF295);(source:Araport11)
AT4G28930	12.8235	0.00111917	5	0.0474207	hypothetical protein;(source:Araport11)
AT2G38220	13.2045	0.00292916	10.4091	0.00362028	RING/U-box superfamily protein;(source:Araport11)	ABERRANT POLLEN DEVELOPMENT 3 (APD3)
At4g16920	14.4426	0.000593854	15.2131	0.000709592	Disease resistance protein (TIR-NBS-LRR class) family;(source:Araport11)
AT2G40955	14.5	0.0159831	23.75	0.00767162	#N/A	#N/A
AT4G10250	15.6111	0.024942	18.6667	0.00458795	Columbia endomembrane-localized small heat shock protein	(ATHSP22.0)
AT3G07260	16.2609	0.00383846	19.1304	0.0337738	SMAD/FHA domain-containing protein;(source:Araport11)
AT1G53540	20.1791	0.00215092	22.0149	0.0173308	HSP20-like chaperones superfamily protein;(source:Araport11)
AT1G53690	21.5533	0.00253497	13.0964	2.55134e-05	Protein of unknown function that is homologous to At5g41010, which encodes a non-catalytic subunit common to nuclear DNA-dependent RNA polymerases II, IV and V; homologous to budding yeast RPB12.
AT2G39320	21.6154	0.00068219	15.6923	0.0163889	Cysteine proteinases superfamily protein;(source:Araport11)
AT4G18150	22.6667	0.000434472	22.8333	0.00523851	Serine/Threonine-kinase, putative (DUF1296);(source:Araport11)
AT3G44800	27.0303	0.000368926	27.3333	0.000116424	Meprin and TRAF (MATH) homology domain-containing protein;(source:Araport11)
AT5G24240	38.7541	0.000103543	35.1967	0.00106151	Encodes PI4Kc3, localizes to the nucleus and has autophosphorylation activity, but no lipid kinase activity. Overexpression mutants display late-flowering phenotype.	(AtPI4Kgamma3)
AT5G36240	43.4545	0.00247087	65.0909	6.3913e-05	zinc knuckle (CCHC-type) family protein;(source:Araport11)
AT4G19240	54.241	0.000126308	58.0308	1.05345e-05	hypothetical protein;(source:Araport11)
AT5G65300	56.4306	0.000782877	83.4164	0.00155295	hypothetical protein;(source:Araport11)
AT3G43280	63.6842	0.00160702	47.7368	0.0111322	hypothetical protein;(source:Araport11)
AT3G26250	66.1667	2.20558e-05	42.5	0.00332883	Cysteine/Histidine-rich C1 domain family protein;(source:Araport11)
AT3G44790	70.1089	6.12337e-06	67.9406	0.00079694	TRAF-like family protein;(source:Araport11)
AT5G27010	75.1875	0.000694249	69.25	1.38356e-05	ARM repeat superfamily protein;(source:Araport11)
AT5G32460	134.818	0.000334082	102.545	2.87658e-05	Transcriptional factor B3 family protein;(source:Araport11)
